# Supplementary material
Source: publisher figshare collection journal article supplement (https://diabetesjournals.figshare.com/articles/dataset/_/13061864)
Supplement: Supplementary file 1 [file 1]

## **Supplemental Files**

### **Connectivity mapping identifies BI-2536 as a potential drug to treat diabetic kidney disease**

Lu Zhang, Zichen Wang, Ruijie Liu, Zhengzhe Li, Jennifer Lin, Megan L. Wojciechowicz, Jiayi Huang, Kyung Lee, Avi Ma'ayan, and John Cijiang He

**Supplemental Figure 1:** Experimental procedures of BI-2536 treatment of OVE26 mice

**Supplemental Figure 2:** Characteristics of OVE26 mice treated with BI-2536

**Supplemental Figure 3:** Col IV and F4/80 immunostaining of OVE26 mouse kidneys

**Supplemental Table 1:** PL1K study metadata

**Supplemental Table 2:** Top 50 drugs predicted to reverse 15 input signatures

**Supplemental Table 3:** DKD consensus genes

**Supplemental Table 4:** Top 50 drug predicted to reverse DKD consensus signatures

**Supplemental File:** Full unedited blot for Figures 7 and 8

Supp. Figure 1

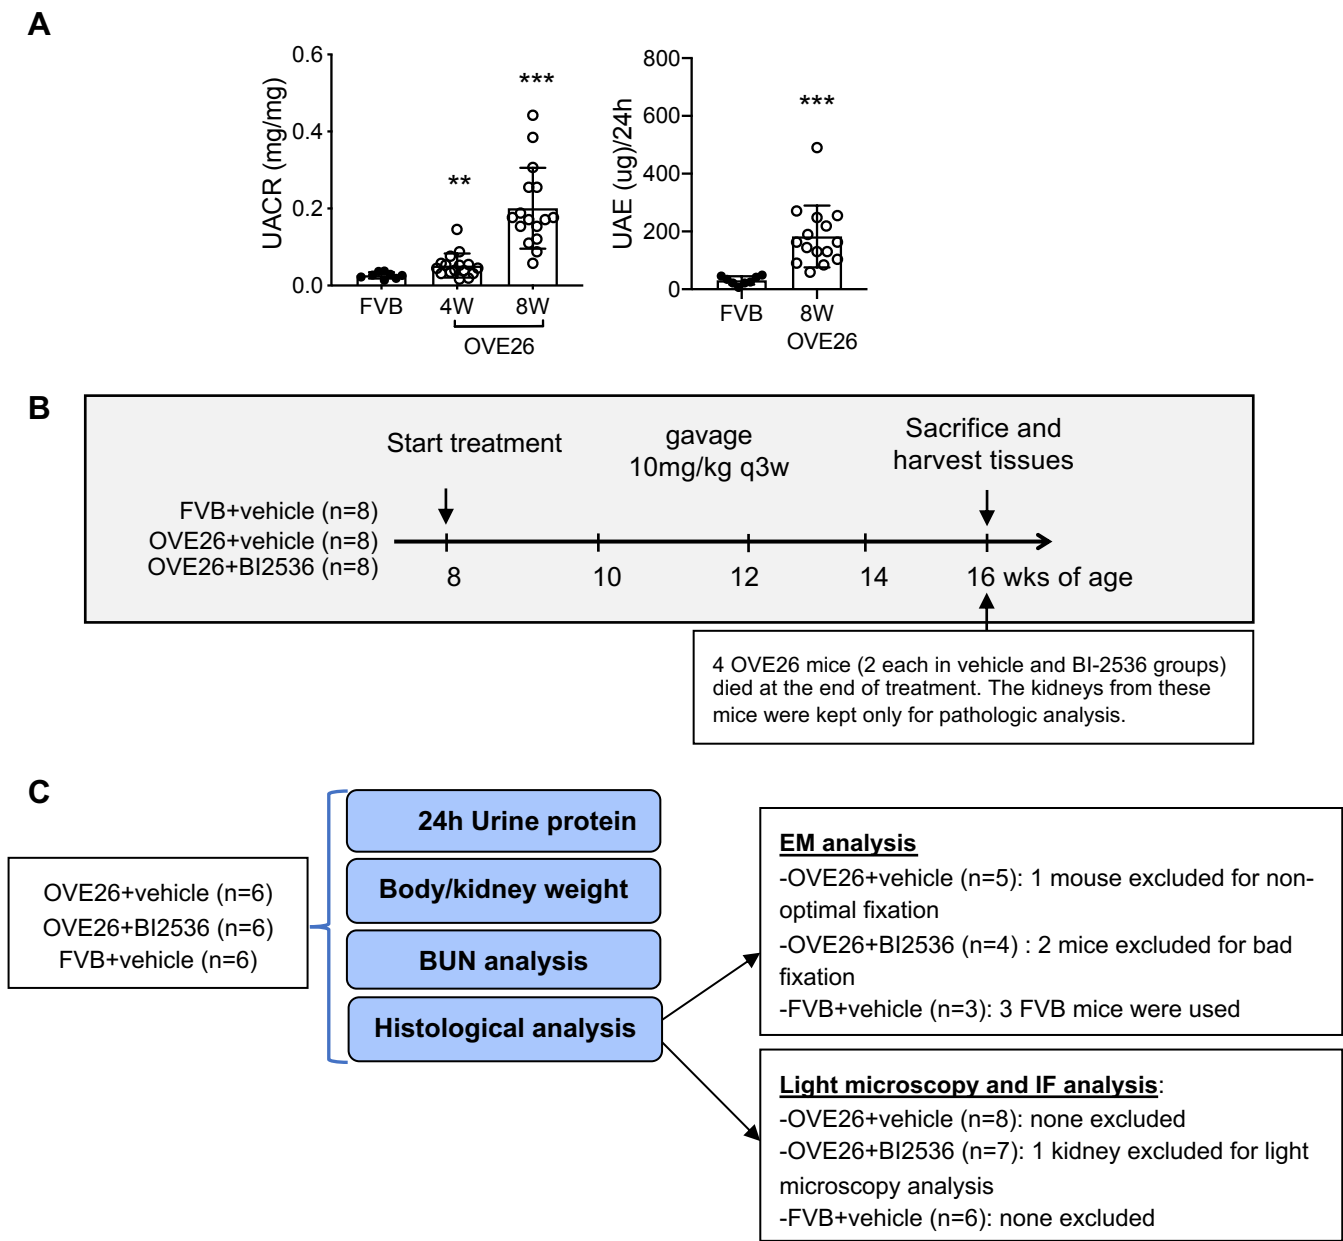

**Supp. Figure 1. Experimental procedures of BI-2536 treatment of OVE26 mice.** (A) UACR measurements of OVE26 mice at 4 and 8 weeks of age (left) and total 24-hour UAE at 8 weeks of age (right). \*\* $P < 0.01$  and \*\*\* $P < 0.001$  vs. FVB control by 1-way ANOVA with Tukey's multiple comparison test. (B) Schematics of the experimental design, treatment was started in 8-week-old OVE26 mice or wildtype litter mate until 16 weeks of age (n=8 mice per group). (C) Schematics of analysis of mouse samples after 6 weeks of treatment.

Supp. Figure 2

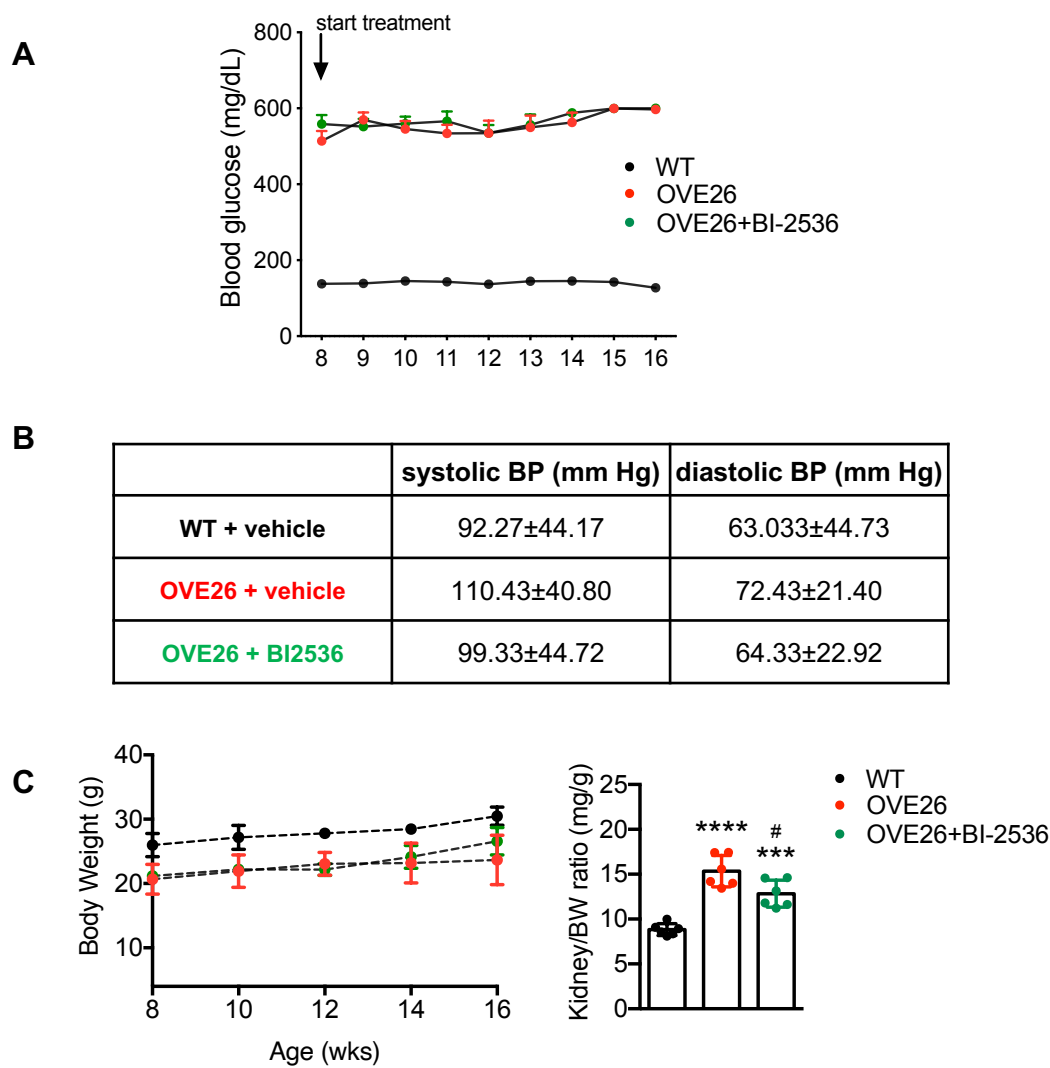

**Supp. Figure 2. Characteristics of OVE26 mice treated with BI-2536.** (A) Average blood glucose measurements of control and diabetic mice. (B) Blood pressure assessment with tail cuff telemetry at 16 weeks post-treatment (n=6 mouse per group). The differences between WT and OVE26 mice were not statistically significant. (C) Body weight of wildtype (WT), OVE26, and OVE26 treated with BI-2536 (OVE26+BI-2536) from 8 weeks to 16 weeks of age and kidney to body weight (BW) ratio at 16 weeks of age. \*\*\*p<0.001, and \*\*\*\*<0.0001 vs. WT; #p<0.05, vs. OVE26 by 1-way ANOVA with Tukey's multiple comparison test.

### Supp. Figure 3

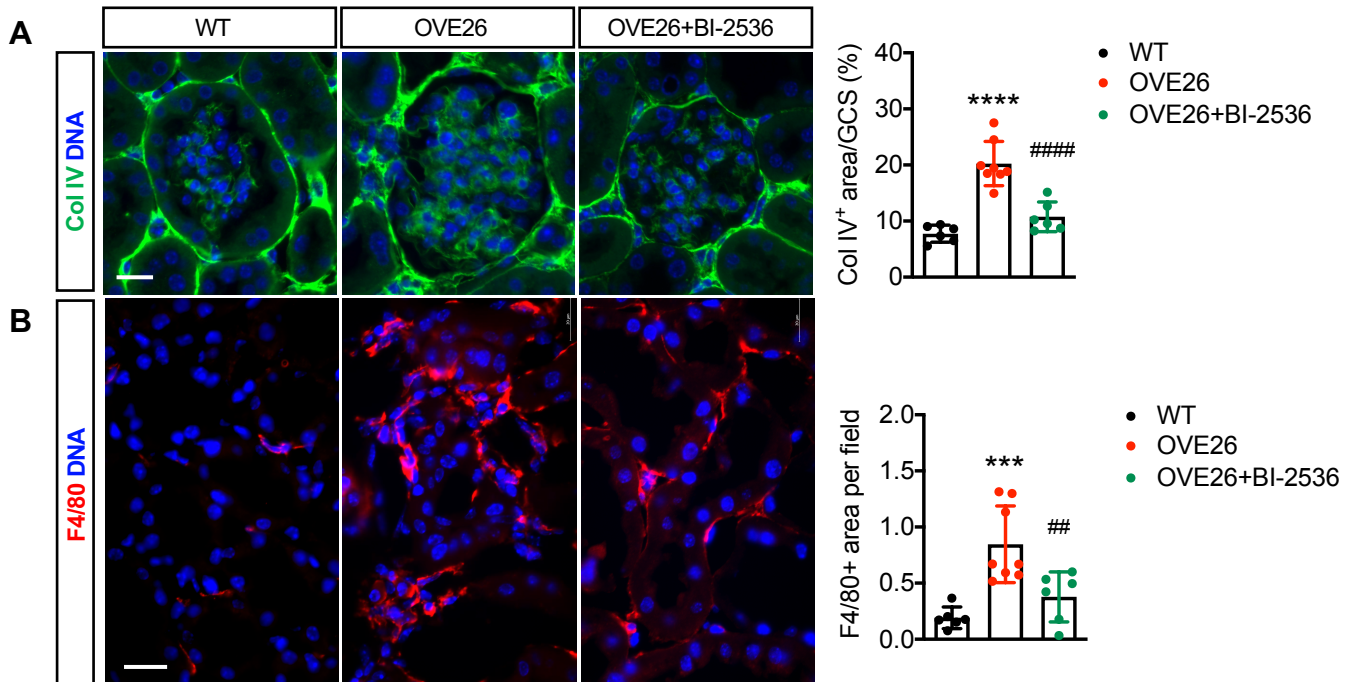

**Supp. Figure 3. Col IV and F4/80 immunostaining of OVE26 mouse kidneys.** Representative immunofluorescent images and quantification of COL IV and (B) F4/80. Scale bars, 20 $\mu$ m. Quantification is shown for percentage of Col IV+ area per glomerular cross section (GCS, n=6-8 mice per group, at least 30 glomeruli analyzed per mouse) and fraction of F4/80 area per field (n=6-8 mice per group, at least 20 fields scored per mouse). \*\*\*p<0.001, and \*\*\*\*p<0.0001 vs. WT; ##p<0.01, and #####p<0.0001 vs. OVE26 by 1-way ANOVA with Tukey's multiple comparison test.
